# Supplementary material for: Inequities among vulnerable communities during the COVID-19 vaccine rollout
Source: bioRxiv or medRxiv preprint supplement (doi:10.1101/2021.06.15.21258978), 2021-06-18
Supplement: Supplementary file [file media-1.pdf]

# Appendix 1

## Average difference in Vaccination Coverage among CCVI Terciles on May 8

eTable 1. Average full vaccination coverage across counties in the top and bottom terciles of vulnerability as defined by the US COVID-19 Community Vulnerability Index.

| <b>Dimension</b>                      | <b>Most vulnerable third of counties: full vaccination coverage</b> | <b>Least vulnerable third of counties: full vaccination coverage</b> | <b>% Difference: full vaccination coverage (least vs most vulnerable)</b> |
|---------------------------------------|---------------------------------------------------------------------|----------------------------------------------------------------------|---------------------------------------------------------------------------|
| <b>CCVI</b>                           | 30.7%                                                               | 34.6%                                                                | +12.7%                                                                    |
| <b>Socioeconomic</b>                  | 30.2%                                                               | 35.3%                                                                | +16.9%                                                                    |
| <b>Minority Status &amp; Language</b> | 32.7%                                                               | 30.9%                                                                | -5.5%                                                                     |
| <b>Housing Type &amp; HH Comp.</b>    | 27.6%                                                               | 34.8%                                                                | +26.1%                                                                    |
| <b>Epidemiological</b>                | 29.6%                                                               | 33.2%                                                                | +12.2%                                                                    |
| <b>Healthcare System</b>              | 31%                                                                 | 34.1%                                                                | +10%                                                                      |
| <b>High Risk Environments</b>         | 30.9%                                                               | 33.1%                                                                | +7.1%                                                                     |
| <b>Population Density</b>             | 32.9%                                                               | 27.7%                                                                | -15.8%                                                                    |

## Average difference in Vaccine Acceptance among CCVI Terciles on May 8

eTable 2. Average vaccine acceptance across counties in the top and bottom terciles of vulnerability as defined by the US COVID-19 Community Vulnerability Index.

| <b>Dimension</b>                      | <b>Most vulnerable third of counties: vaccine acceptance coverage</b> | <b>Least vulnerable third of counties: vaccine acceptance coverage</b> | <b>% Difference: vaccine acceptance coverage (least vs most vulnerable)</b> |
|---------------------------------------|-----------------------------------------------------------------------|------------------------------------------------------------------------|-----------------------------------------------------------------------------|
| <b>CCVI</b>                           | 85.5%                                                                 | 86.1%                                                                  | +0.7%                                                                       |
| <b>Socioeconomic</b>                  | 85.95%                                                                | 87.3%                                                                  | +1.6%                                                                       |
| <b>Minority Status &amp; Language</b> | 87.5%                                                                 | 80%                                                                    | -8.6%                                                                       |
| <b>Housing Type &amp; HH Comp.</b>    | 82.6%                                                                 | 87.2%                                                                  | +5.6%                                                                       |
| <b>Epidemiological</b>                | 80.2%                                                                 | 87.8%                                                                  | +9.5%                                                                       |
| <b>Healthcare System</b>              | 86.1%                                                                 | 86%                                                                    | +0.1%                                                                       |
| <b>High Risk Environments</b>         | 82.9%                                                                 | 87.7%                                                                  | +5.8%                                                                       |
| <b>Population Density</b>             | 86.9%                                                                 | 79.3%                                                                  | -8.8%                                                                       |
